# Supplementary material for: Percutaneous Mechanical Ventricular Support in Acute Cardiac Care: A UK Quaternary Centre Experience Using 2.5L, 3.8L and 5.0L Impella Catheters
Source: Springer Nature journal article supplement (doi:10.1007/s40119-014-0033-8), 2014-12-16
Supplement: MOESM1 [file 9339388]

- A retrospective study of 49 patients who underwent attempted Impella implantation was conducted at The Queen Elizabeth Hospital, Birmingham, UK; this was the first real world registry experience with the Impella<sup>®</sup> device in the UK.
- Impella implantation was successful in 48 (98%) patients: 45 of these underwent high-risk percutaneous coronary intervention, 1 balloon valvuloplasty, and 3 patients had Impella as a bridge to cardiac transplant.
- In-hospital mortality was 20%, which is higher than in the PROTECT-II trial and Europella and USPella registries, possibly due to smaller patient numbers and a more complex case mix.
- There was a low incidence of vascular complications (2% of patients).
- The 3.8L Impella device (11 patients; 23%) showed comparable outcomes with the 2.5L device (36 patients; 75%), with no increase in vascular complications.

This summary slide represents the opinions of the authors. For a full list of acknowledgments and conflicts of interest for all authors of this article, please see the full text online. Copyright © The Authors 2014. Creative Commons Attribution Noncommercial License (CC BY-NC).
